# Supplementary material for: Formation of dimethyl carbonateviadirect esterification of CO2with methanol on reduced or stoichiometric CeO2(111) and (110) surfaces
Source: Royal Society of Chemistry journal article supplement (doi:10.1039/d1cp02152d), 2021-01-01
Supplement: d1cp02152d1.pdf [file d1cp02152d1.pdf]

**Electronic Supplementary Information**

**Formation of Dimethyl Carbonate via Direct Esterification of CO<sub>2</sub> with Methanol  
on reduced or stoichiometric CeO<sub>2</sub> (111) and (110) Surfaces**

Jian Jiang, Chris M. Marin, Avinash Kumar Both, Chin Li Cheung, Lei Li\*, and Xiao Cheng  
Zeng\*

Department of Chemistry, University of Nebraska-Lincoln, Lincoln, NE 68588

To whom correspondence should be addressed:

lil33@sustech.edu.cn; xzeng1@unl.edu

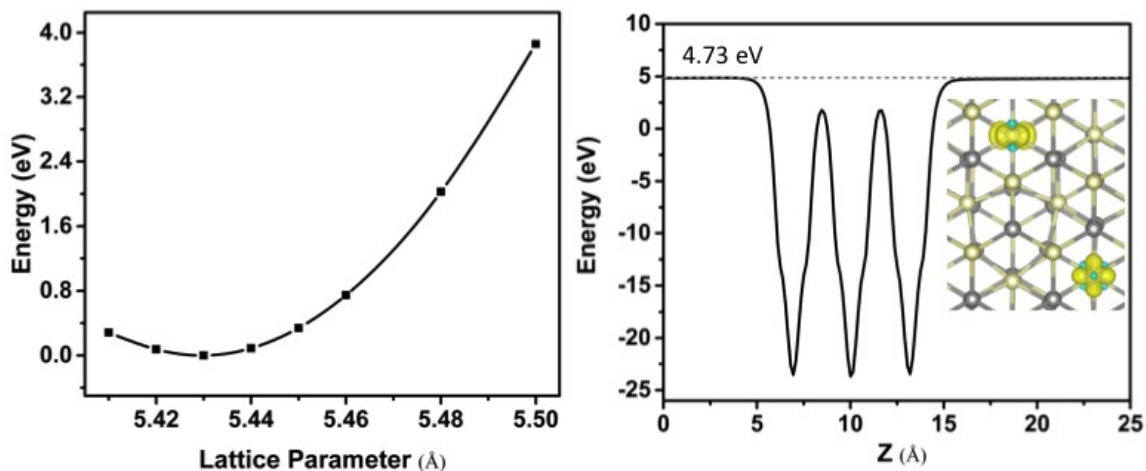

**Figure S1.** Computed total energy per unit cell of the bulk  $\text{CeO}_2$  versus the lattice parameter (left panel). The right panel shows potential distribution along the Z direction for the simulated  $\text{CeO}_2$  slab with one oxygen vacancy on the surface. The value 4.73 eV is the computed work function. The inset image shows the spin density of the  $\text{CeO}_2$  (111) surface with one oxygen vacancy, suggesting  $\text{Ce}^{3+}$  is located next-nearest to the oxygen vacancy. The gray and the ivory balls represent oxygen and cerium atoms, respectively.

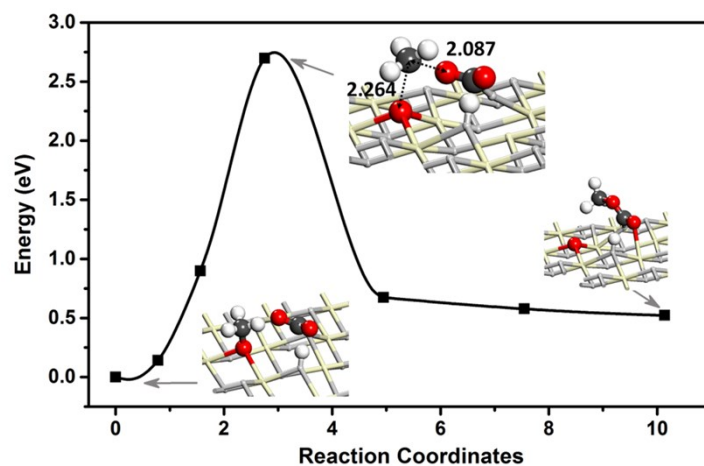

**Figure S2.** Energy profile computed for the reaction between the methoxy group and the adsorbed CO<sub>2</sub> molecule (in the bent configuration) on the reduced CeO<sub>2</sub> (111). The inset images represent the geometric structures for the reactant, transition and product states, respectively. The bond lengths are labelled in unit Å. The white, black, grey, red and ivory balls represent H, C, O in CeO<sub>2</sub>, O in CO<sub>2</sub> and methanol, and Ce atoms, respectively.

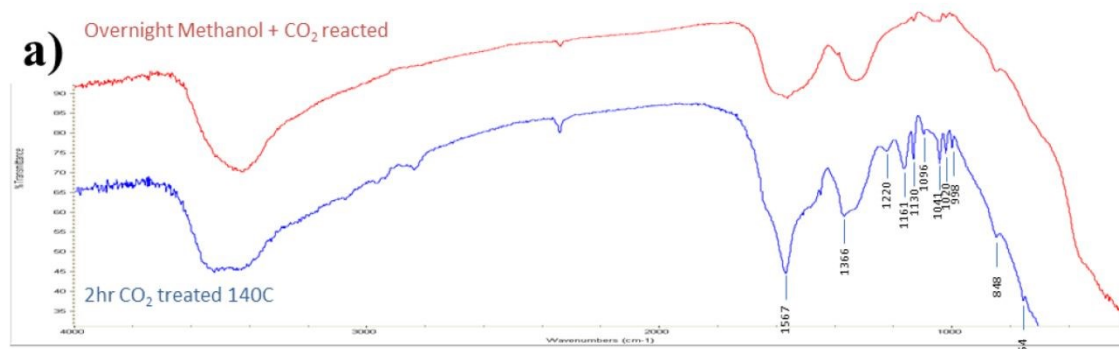

**b) CO<sub>2</sub> Peaks Lost or diminished: 1567, 1366, 1161, 1130, 1041, 1020, 998**

**Figure S3.** (a) Measured FTIR transmission spectra of CO<sub>2</sub> on treated ceria after cooling and venting (blue curve) and after a subsequent treatment with methanol (red curve). Note the pronounced peaks from 1567 cm<sup>-1</sup> to about 1000 cm<sup>-1</sup> which are removed after reacting with methanol at room temperature. (b) Peak positions (in cm<sup>-1</sup>) which were found removed by the methanol compared to peak positions published for CO<sub>2</sub> on ceria. [Figure is taken from a PhD thesis<sup>1</sup>]

**Table S1.** Activation barrier of each elementary reaction for the DMC formation on the CeO<sub>2</sub>(111) surface. The symbol ‘\*’ represents the active site. The activation energy of the barrierless reaction is set as 0.01 eV and the corresponding reverse reaction is accordingly adjusted. The geometric structure of each state is presented in Figure S4.

| Elementary reactions       |                                                      | Forward reaction barrier (eV) | Reverse reaction barrier (eV) |
|----------------------------|------------------------------------------------------|-------------------------------|-------------------------------|
| Stoichiometric active site | R1. $CO_2 + * \rightarrow CO_2^{*linear}$            | 0.01                          | 0.27                          |
|                            | R2. $ME + * \rightarrow ME^*$                        | 0.01                          | 0.77                          |
|                            | R3. $CO_2^{*linear} \rightarrow CO_2^{*bent}$        | 0.18                          | 0.67                          |
|                            | R4. $CO_2^{*linear} + ME^* \rightarrow MMC^* + H^*$  | 0.24                          | 0.16                          |
|                            | R5. $CO_2^{*bent} + ME^* \rightarrow MMC^* + H^*$    | 0.67                          | 0.20                          |
|                            | R6. $MMC^* + ME^* \rightarrow DMC^* + OH^*$          | 2.78                          | 1.53                          |
|                            | R7. $DMC^* \rightarrow DMC$                          | 0.54                          | 0.01                          |
|                            | R8. $H^* + OH^* \rightarrow H_2O$                    | 0.38                          | 0.01                          |
| Reduced active site        | R9. $CO_2 + *_{vacancy} \rightarrow CO_2^{*linear}$  | 0.01                          | 0.44                          |
|                            | R10. $ME + *_{vacancy} \rightarrow ME^*$             | 0.01                          | 1.03                          |
|                            | R11. $CO_2^{*linear} \rightarrow CO_2^{*bent}$       | 0.09                          | 0.77                          |
|                            | R12. $CO_2^{*linear} + ME^* \rightarrow MMC^* + H^*$ | 0.01                          | 1.38                          |
|                            | R13. $CO_2^{*bent} + ME^* \rightarrow MMC^* + H^*$   | 2.71                          | 2.21                          |
|                            | R14. $MMC^* + ME^* \rightarrow DMC^* + H^*$          | 1.00                          | 0.43                          |
|                            | R15. $DMC^* \rightarrow DMC$                         | 0.66                          | 0.01                          |
|                            | R16. $H^* + OH^* \rightarrow H_2O^* + *_{vacancy}$   | 1.41                          | 0.02                          |
|                            | R17. $H_2O^* \rightarrow H_2O$                       | 0.74                          | 0.01                          |

**Table S2.** Activation barrier of elementary reaction of DMC formation on the CeO<sub>2</sub>(110) surface. The symbol ‘\*’ represents the active site. The activation energy of the barrierless reaction is set as 0.01 eV and the corresponding reverse reaction is accordingly adjusted. The geometric structure of each state is presented in Figure S5.

| Elementary reactions       |                                                                  | Forward reaction barrier (eV) | Reverse reaction barrier (eV) |
|----------------------------|------------------------------------------------------------------|-------------------------------|-------------------------------|
| Stoichiometric active site | R1. $CO_2 + * \rightarrow CO_2^{*linear}$                        | 0.01                          | 0.41                          |
|                            | R2. $ME + * \rightarrow ME^*$                                    | 0.01                          | 1.11                          |
|                            | R3. $CO_2^{*linear} \rightarrow CO_2^{*bent}$                    | 0.05                          | 1.24                          |
|                            | R4. $CO_2^{*linear} + ME^* \rightarrow MMC^* + H^*$              | 0.29                          | 2.19                          |
|                            | R5. $CO_2^{*bent} + ME^* \rightarrow MMC^* + H^*$                | 1.09                          | 1.00                          |
|                            | R6. $MMC^* + ME^* \rightarrow DMC^* + OH^*$                      | 3.26                          | 2.16                          |
|                            | R7. $DMC^* \rightarrow DMC$                                      | 0.99                          | 0.01                          |
|                            | R8. $H^* + OH^* \rightarrow H_2O$                                | 1.14                          | 0.01                          |
| Reduced active site        | R9. $CO_2 + *_{vacancy} \rightarrow CO_2^{*linear}$              | 0.01                          | 0.42                          |
|                            | R10. $CO_2^{*linear} \rightarrow CO_2^{*bent_2}$                 | 0.11                          | 1.54                          |
|                            | R11. $ME + *_{vacancy} \rightarrow ME^*$                         | 0.01                          | 1.32                          |
|                            | R12. $CO_2^{*bent_2} \rightarrow CO_2^{*bent_{rotated_2}}$       | 0.27                          | 0.01                          |
|                            | R13. $CO_2^{*linear} \rightarrow CO_2^{*bent_1}$                 | 0.27                          | 1.30                          |
|                            | R14. $CO_2^{*linear} + ME^* \rightarrow MMC^* + H^*$             | 0.39                          | 1.26                          |
|                            | R15. $CO_2^{*bent_2} + ME^* \rightarrow MMC^* + H^*$             | 0.53                          | 0.09                          |
|                            | R16. $CO_2^{*bent_{rotated_2}} + ME^* \rightarrow MMC^* + H^*$   | 1.17                          | 0.99                          |
|                            | R17. $CO_2^{*bent_{rotated_2}} + ME^* \rightarrow MMC_1^* + H^*$ | 1.09                          | 0.86                          |
|                            | R18. $CO_2^{*bent_1} + ME^* \rightarrow MMC^* + H^*$             | 1.10                          | 1.05                          |
|                            | R19. $MMC^* + ME^* \rightarrow DMC^* + H^*$                      | 1.39                          | 0.47                          |
|                            | R20. $MMC_1^* + ME^* \rightarrow DMC^* + H^*$                    | 1.50                          | 0.76                          |
|                            | R21. $DMC^* \rightarrow DMC$                                     | 0.88                          | 0.01                          |
|                            | R22. $H^* + OH^* \rightarrow H_2O^* + *_{vacancy}$               | 1.16                          | 0.25                          |
|                            | R23. $H_2O^* \rightarrow H_2O$                                   | 1.18                          | 0.07                          |



Table S3. Bader charge analysis of pre-absorbed CO<sub>2</sub> (in different configuration) on pristine and reduced CeO<sub>2</sub> (110) and (111) surfaces.

| CO <sub>2</sub>      | Atom Type |      |      | Total Charge | Charge Transferred |
|----------------------|-----------|------|------|--------------|--------------------|
|                      | C         | O    | O    |              |                    |
| STO_CeO <sub>2</sub> |           |      |      |              |                    |
| (110)                |           |      |      |              |                    |
| Linear               | 3.48      | 6.33 | 6.33 | 16.14 e      | 0.14 e             |
| Bent                 | 3.44      | 6.69 | 6.70 | 16.83 e      | 0.83 e             |
| Ov_CeO <sub>2</sub>  |           |      |      |              |                    |
| (110)                |           |      |      |              |                    |
| Linear               | 3.50      | 6.33 | 6.34 | 16.17 e      | 0.17 e             |
| Bent <sub>1</sub>    | 3.46      | 6.70 | 6.71 | 16.87 e      | 0.87 e             |
| Bent <sub>2</sub>    | 3.44      | 6.54 | 6.95 | 16.93 e      | 0.93 e             |
| STO_CeO <sub>2</sub> |           |      |      |              |                    |
| (111)                |           |      |      |              |                    |
| Linear               | 3.46      | 6.27 | 6.33 | 16.07 e      | 0.07 e             |
| Bent                 | 3.45      | 6.63 | 6.62 | 16.70 e      | 0.70 e             |
| Ov_CeO <sub>2</sub>  |           |      |      |              |                    |
| (111)                |           |      |      |              |                    |
| Linear               | 3.44      | 6.20 | 6.44 | 16.09 e      | 0.09 e             |
| Bent                 | 3.46      | 6.62 | 6.74 | 16.81 e      | 0.81 e             |



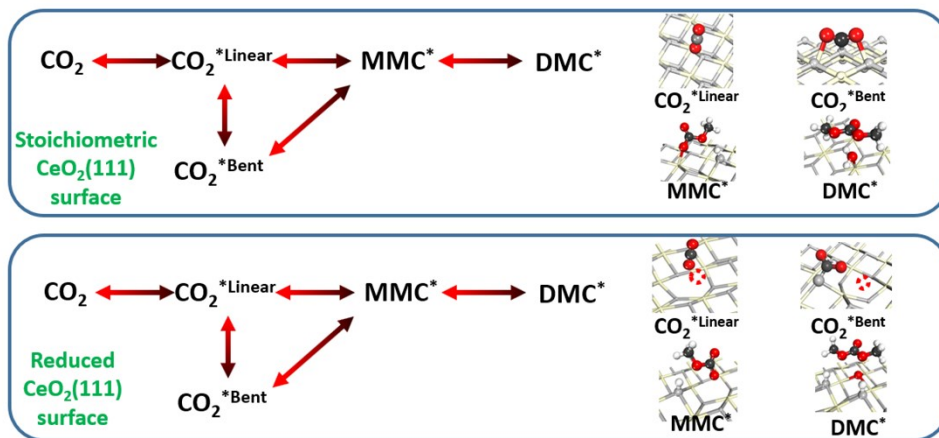

**Figure S4.** Pathways and intermediates of the DMC formation on the  $\text{CeO}_2(111)$  surface.

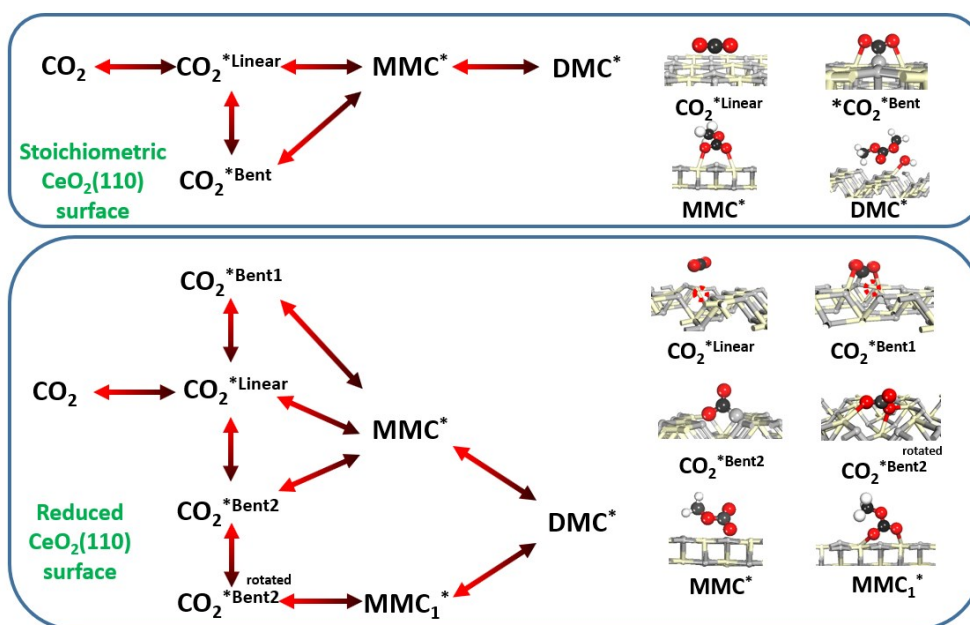

**Figure S5.** Main pathways and intermediates of the DMC formation on the  $\text{CeO}_2(110)$  surface.

### Supporting Reference

1. Marin, C. M., *Synthesis and applications of lanthanide sulfides and oxides*. University of Nebraska-Lincoln: 2016.
